# Supplementary material for: Regulation of salt tolerance in the roots of Zea mays by L-histidine through transcriptome analysis
Source: PubMed Central journal article supplement (PMC9742451; doi:10.3389/fpls.2022.1049954), 2022-11-28

A

Length distribution of transcripts

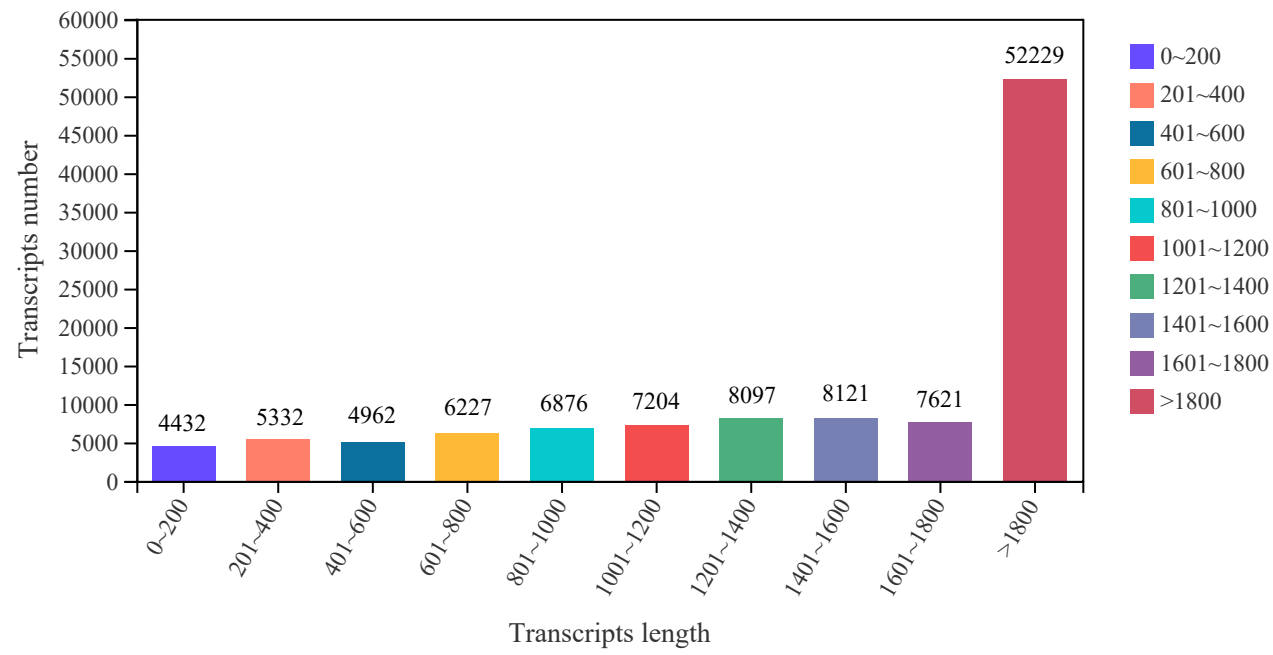

B

New transcripts classification

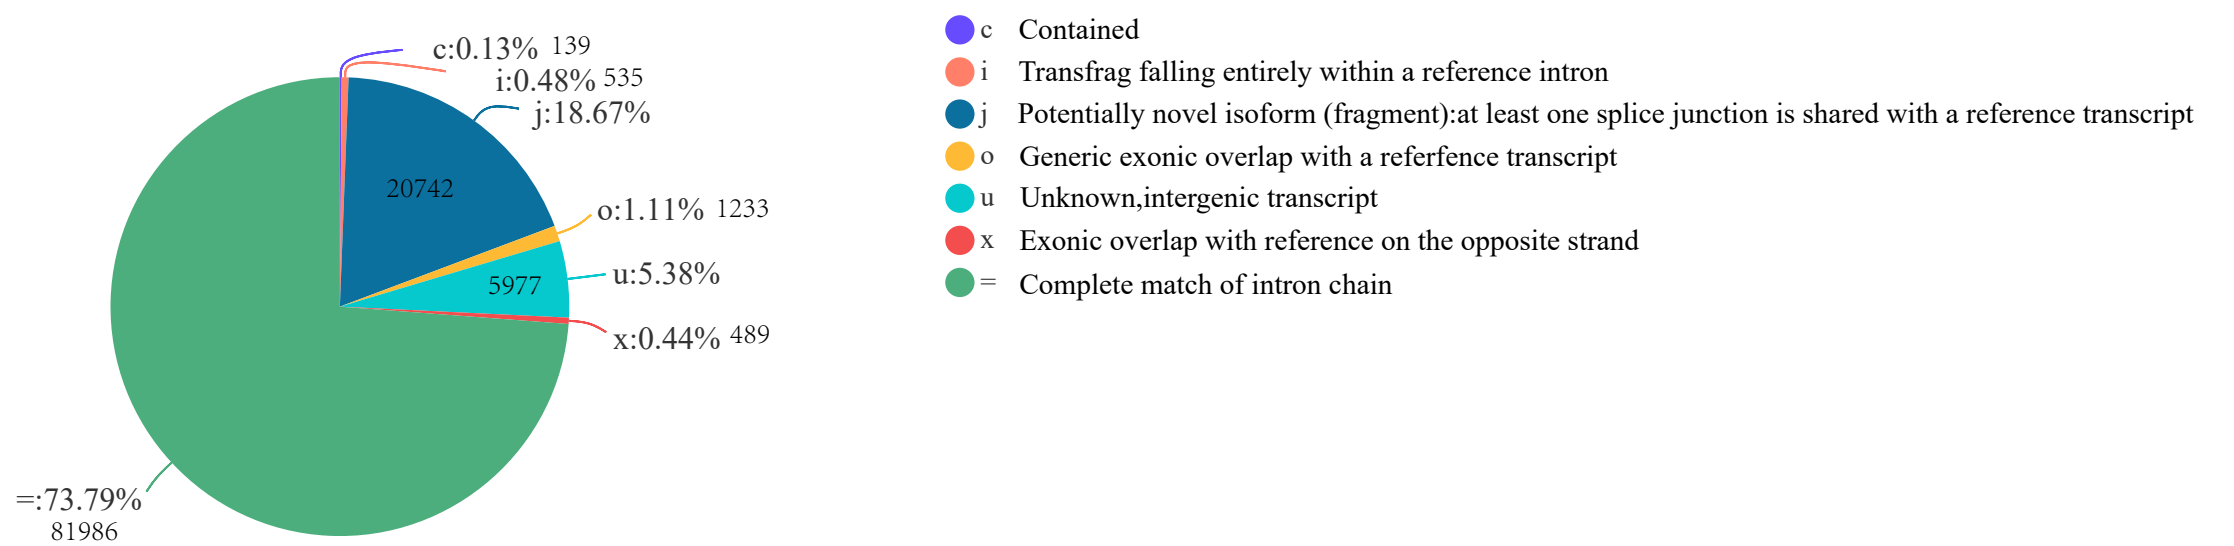

Supplement: DataSheet_2.pdf [file DataSheet_2.pdf]
